# Supplementary material for: β-Dicyanovinyl substituted porphyrinogen: synthesis, a reversible sensor for picric acid among explosives and a unique sensor for cyanide and fluoride ions by switching between various porphyrinoid states
Source: Royal Society of Chemistry journal article supplement (doi:10.1039/c7dt01158j), 2017-01-01
Supplement: c7dt01158j1.pdf [file c7dt01158j1.pdf]

## Electronic Supporting Information

### $\beta$ -Dicyanovinyl Substituted Porphyrinogen: Synthesis, Reversible Sensor for Picric acid among Explosives and Unique Sensor for Cyanide and Fluoride ions by Switching between various Porphyrinoid states

Mandeep K. Chahal and Muniappan Sankar\*

*Department of Chemistry, Indian Institute of Technology Roorkee, Roorkee-247667, India*

#### Table of Contents

|                                                                                                                                                                                                                                                                                                                                                                                                                       | Page No |
|-----------------------------------------------------------------------------------------------------------------------------------------------------------------------------------------------------------------------------------------------------------------------------------------------------------------------------------------------------------------------------------------------------------------------|---------|
| <b>Figure S1.</b> $^1\text{H}$ NMR spectrum of OxP-MN ( <b>1</b> ).                                                                                                                                                                                                                                                                                                                                                   | 2       |
| <b>Figure S2.</b> ESI-MS(-) mass spectrum of OxP-MN ( <b>1</b> ).                                                                                                                                                                                                                                                                                                                                                     | 3       |
| <b>Figure S3.</b> Expanded ESI-MS(-) mass spectrum of OxP-MN ( <b>1</b> ).                                                                                                                                                                                                                                                                                                                                            | 4       |
| <b>Figure S4.</b> (a) Hill plot for OxP-MN ( <b>1</b> ) and PA system; (b) Job's plot for the complexation of <b>1</b> and picric acid (PA): total concentration is constant ( $1.5 \times 10^{-5}\text{M}$ ); (c) Absorbance of <b>1</b> in $\text{CH}_2\text{Cl}_2$ , normalized between the minimum absorbance was found at zero equiv of PA and the maximum absorbance.                                           | 5       |
| <b>Figure S5.</b> Absorption spectra of OxP-MN in the presence of various NAC's (picric acid (PA), 2,4-dinitrophenol (2,4-DNP), 4-nitrophenol (4-NP), 4-nitrotoluene (4-NT), nitromethane (NM), nitrobenzene (NB), 1,3-dinitrobenzene (1,3-DNB), 3-nitrotoluene (3-NT), 2,4-dinitrotoluene (2,4-DNT), 4-nitroaniline (4-NA), phenol, 1-iodo-2-nitrobenzene (INB), 2-nitrophenol (2-NP)) in $\text{CH}_2\text{Cl}_2$ . | 6       |
| <b>Figure S6.</b> Selectivity of nitroaromatics at a wavelength of 756 nm in a solution having <b>1</b> + nitroaromatics (blue bar) and <b>1</b> + nitroaromatics + PA (red bar) observed using absorbance spectral studies.                                                                                                                                                                                          | 6       |
| <b>Figure S7.</b> $^1\text{H}$ NMR spectra of neat Picric acid (PA) and OxP-MN ( <b>1</b> ) in the absence and presence of picric acid (PA).                                                                                                                                                                                                                                                                          | 7       |
| <b>Figure S8.</b> The Benesi-Hildebrand plots constructed for evaluation of binding constants of $\text{F}^-$ with OxP-MN ( <b>1</b> ).                                                                                                                                                                                                                                                                               | 7       |
| <b>Figure S9.</b> Job's plot for binding of fluoride ions by compound <b>1</b> indicating a 2:1 stoichiometry.                                                                                                                                                                                                                                                                                                        | 7       |
| <b>Figure S10.</b> Absorption spectral changes upon addition of $\text{F}^-$ and $\text{CN}^-$ ions OxP-MN in different solvents.                                                                                                                                                                                                                                                                                     | 8       |
| <b>Figure S11.</b> MALDI-TOF mass spectrum of reduced porphyrin ( $\text{H}_2\text{-TDtBHPP-MN}$ , <b>7</b> ) in case of ( $\text{OxP-MN}\cdot 2\text{F}^-$ ) using ascorbic acid.                                                                                                                                                                                                                                    | 8       |
| <b>Figure S12.</b> MALDI-TOF mass spectrum of reduced anionic porphyrin ( $\text{H}_2\text{-TDtBHPP-TCE}$ , <b>3</b> ) derived from cyano adduct of oxoporphyrinogen ( <b>2</b> ) using ascorbic acid.                                                                                                                                                                                                                | 9       |
| <b>Figure S13.</b> $^1\text{H}$ NMR spectrum of reduced anionic porphyrin ( $\text{H}_2\text{-TDtBHPP-TCE}$ , <b>3</b> ) derived from cyano adduct of oxoporphyrinogen ( <b>2</b> ) using ascorbic acid.                                                                                                                                                                                                              | 9       |
| <b>Figure S14.</b> MALDI-TOF mass spectrum of reduced porphyrin ( $\text{H}_2\text{-TDtBHPP}$ ) obtained from $\text{OxP}\cdot 2\text{F}^-$ using ascorbic acid as reductant.                                                                                                                                                                                                                                         | 10      |
| <b>Figure S15.</b> MALDI-TOF mass spectrum of reduced porphyrin ( $\text{H}_2\text{-TDtBHPP}$ ) obtained from $\text{OxP}\cdot 2\text{CN}^-$ using ascorbic acid as reductant.                                                                                                                                                                                                                                        | 10      |
| <b>Figure S16.</b> Spectral changes for the competitive recognition of $\text{CN}^-$ using a mixture of $\text{CN}^-$ and other anions using OxP-MN ( <b>1</b> ).                                                                                                                                                                                                                                                     | 11      |
| <b>Figure S17.</b> Absorption spectral features of OxP-MN ( <b>1</b> ) on sequential addition of PA and $\text{CN}^-$ ions, respectively: path D (porphyrinogen to protonated porphodimethene), path E (protonated                                                                                                                                                                                                    | 11      |

|                                                                                                                                                                                                                                                                                                                                                                     |    |
|---------------------------------------------------------------------------------------------------------------------------------------------------------------------------------------------------------------------------------------------------------------------------------------------------------------------------------------------------------------------|----|
| porphodimethene to OxP-MN), path F (OxP-MN to OxP-MN+CN <sup>-</sup> •2CN <sup>-</sup> ).                                                                                                                                                                                                                                                                           |    |
| <b>Figure S18.</b> Absorption spectral features of OxP-MN ( <b>1</b> ) on sequential addition of CN <sup>-</sup> and PA, respectively: path D' (porphyrinogen to OxP-MN+CN <sup>-</sup> •2CN <sup>-</sup> ), path E' (OxP-MN+CN <sup>-</sup> •2CN <sup>-</sup> to OxP-MN+CN <sup>-</sup> ), path F' (OxP-MN+CN <sup>-</sup> to anionic protonated porphodimethene). | 12 |
| <b>Table S1.</b> UV/Vis spectral data of porphyrinogen in CH <sub>2</sub> Cl <sub>2</sub> at 298K.                                                                                                                                                                                                                                                                  | 5  |
| <b>Scheme S1.</b> Response of OxP-MN ( <b>1</b> ) towards CN <sup>-</sup> and PA under indicator displacement assay (IDA) without restriction on queue.                                                                                                                                                                                                             | 12 |

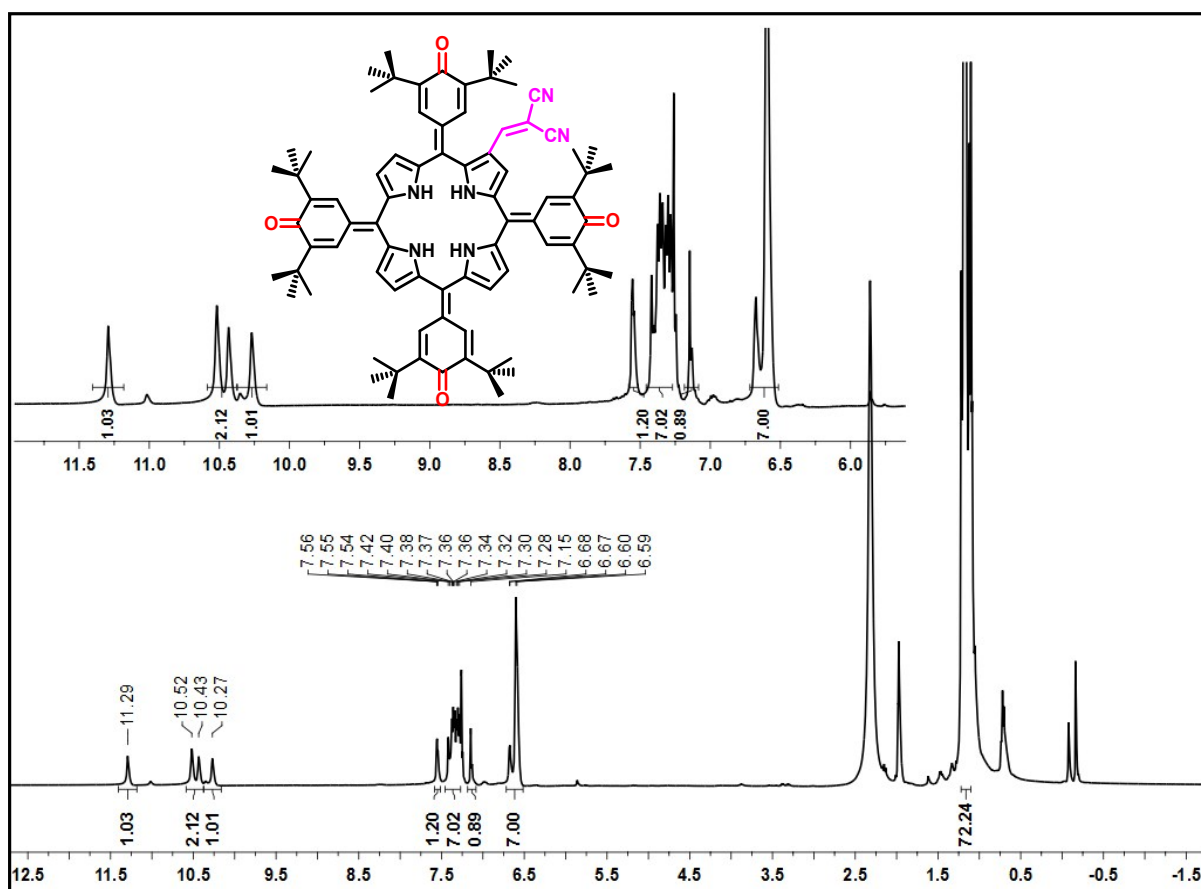

**Figure S1.** <sup>1</sup>H NMR spectrum of OxP-MN (**1**).

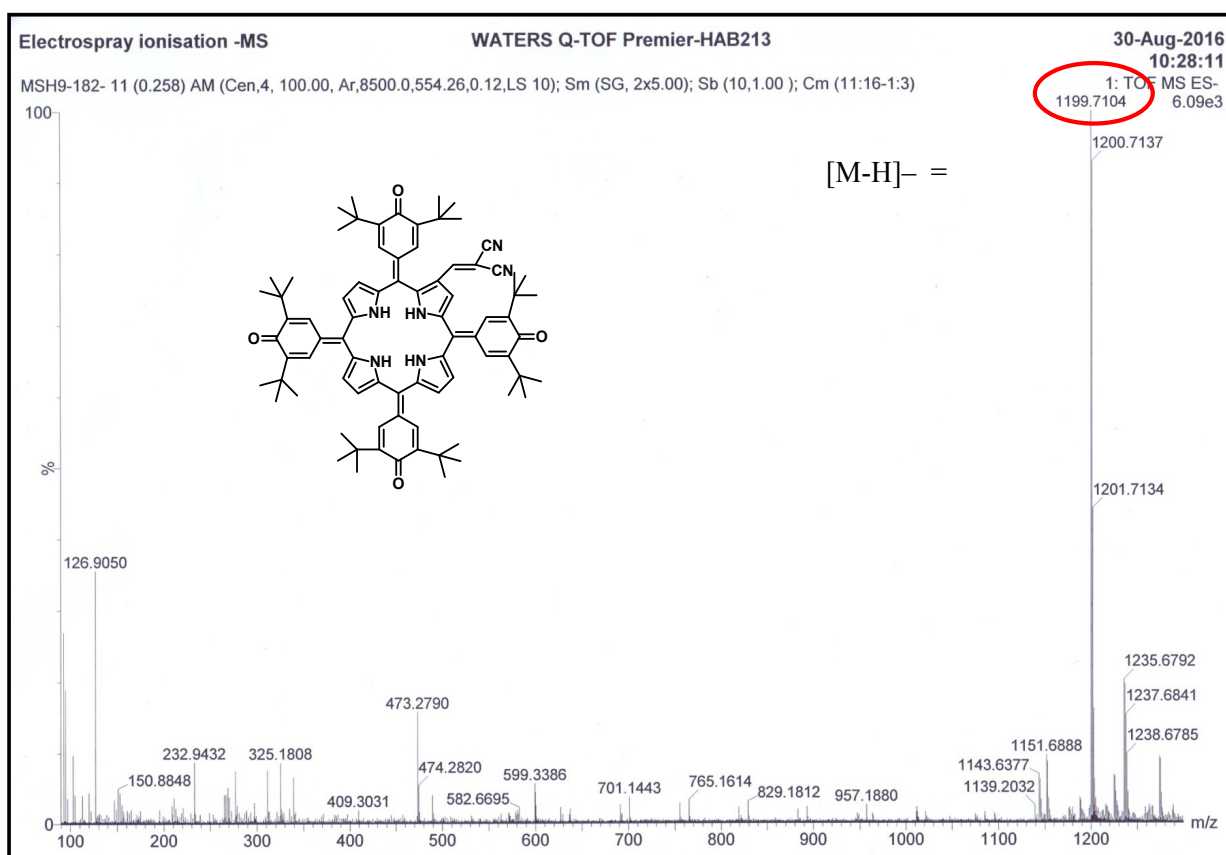

**Figure S2.** ESI-MS(-) mass spectrum of OxP-MN (**1**).

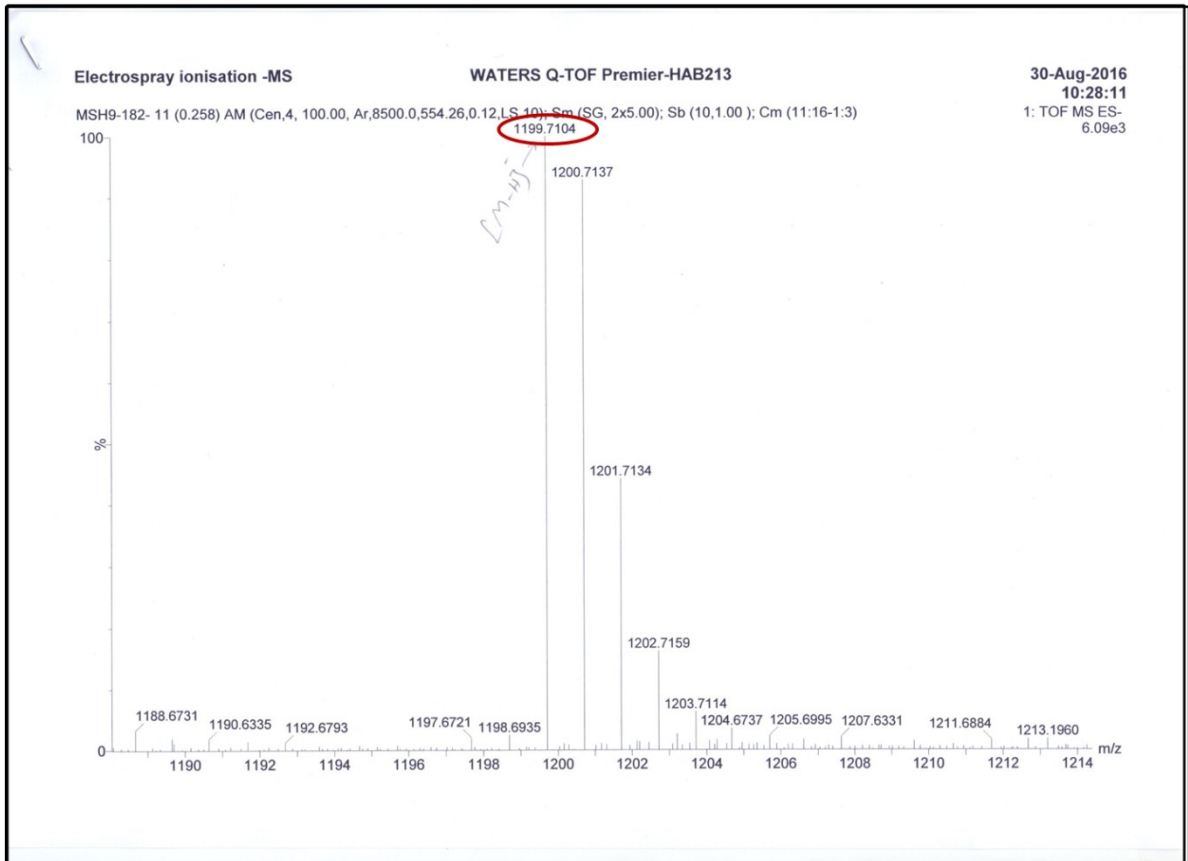

**Figure S3.** Expanded ESI-MS(-) mass spectrum of OxP-MN (1).

**Table S1.** UV/Vis spectral data of porphyrinogen in CH<sub>2</sub>Cl<sub>2</sub> at 298K.

| Compound                     | $\lambda$ nm |
|------------------------------|--------------|
| OxP                          | 511          |
| OxP-MN ( <b>1</b> )          | 507          |
| $\beta$ -Br <sub>8</sub> OxP | 344, 487     |

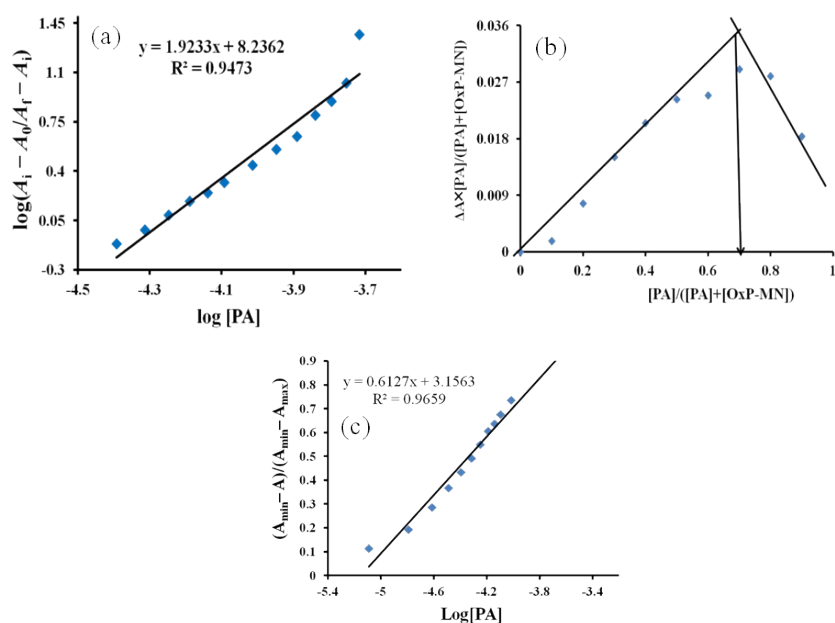

**Figure S4.** (a) Hill plot for OxP-MN (**1**) and PA system; (b) Job's plot for the complexation of **1** and picric acid (PA): total concentration is constant ( $1.5 \times 10^{-5}$ M); (c) Absorbance of **1** in CH<sub>2</sub>Cl<sub>2</sub>, normalized between the minimum absorbance was found at zero equiv of PA and the maximum absorbance.

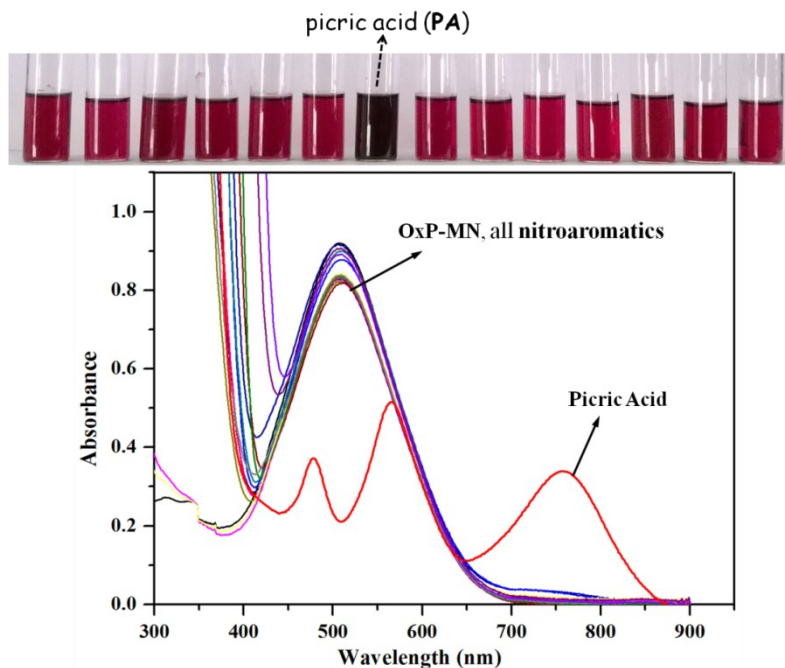

**Figure S5.** Absorption spectra of OxP-MN in the presence of various NAC's (picric acid (PA)), 2,4-dinitrophenol (2,4-DNP), 4-nitrophenol (4-NP), 4-nitrotoluene (4-NT), nitromethane (NM), nitrobenzene (NB), 1,3-dinitrobenzene (1,3-DNB), 3-nitrotoluene (3-NT), 2,4-dinitrotoluene (2,4-DNT), 4-nitroaniline (4-NA), phenol, 1-iodo-2-nitrobenzene (INB), 2-nitrophenol (2-NP)) in  $\text{CH}_2\text{Cl}_2$ .

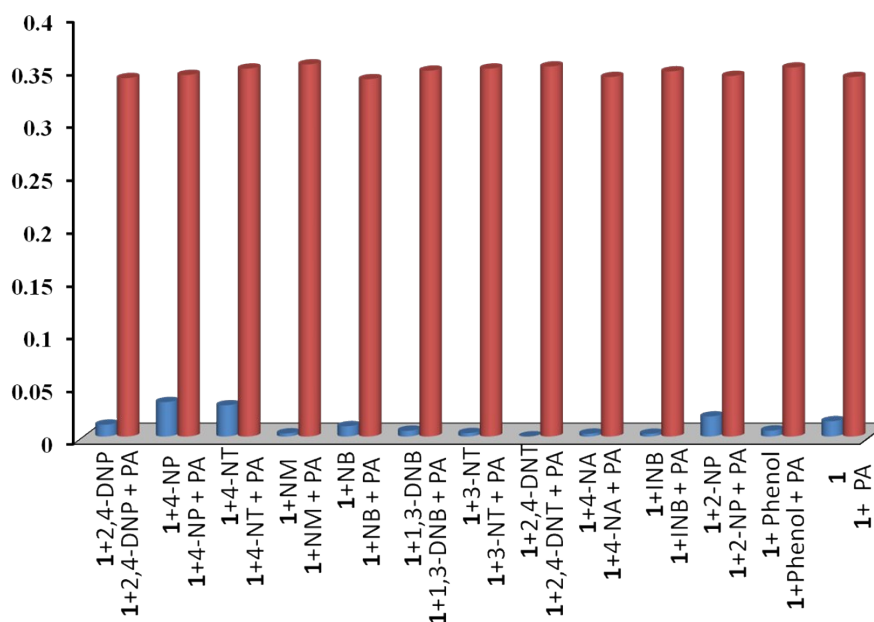

**Figure S6.** Selectivity of nitroaromatics at a wavelength of 756 nm in a solution having **1** + nitroaromatics (blue bar) and **1** + nitroaromatics + PA (red bar) observed using absorbance spectral studies.

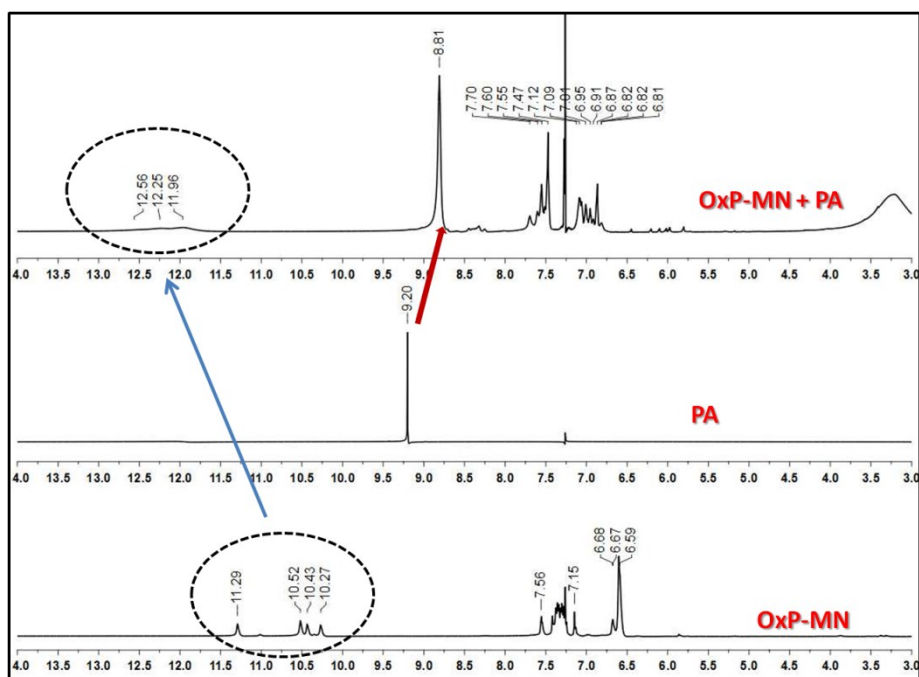

**Figure S7.**  $^1\text{H}$  NMR spectra of neat Picric acid (PA) and OxP-MN (**1**) in the absence and presence of picric acid (PA).

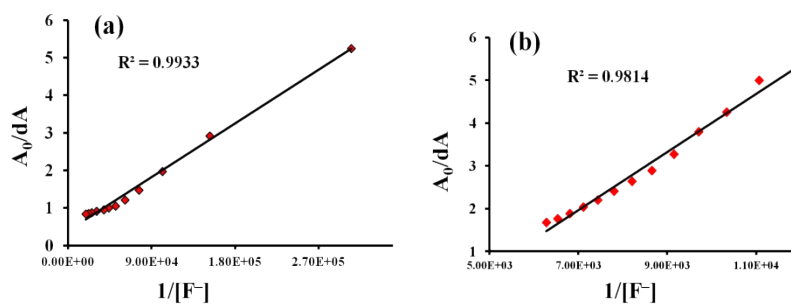

**Figure S8.** The Benesi-Hildebrand plots constructed for evaluation of binding constants of  $\text{F}^-$  with OxP-MN (**1**).

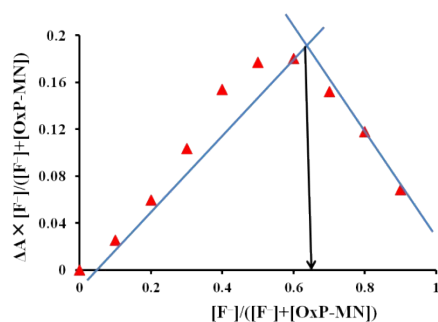

**Figure S9.** Job's plot for binding of fluoride ions by compound **1** indicating a 2:1 stoichiometry.

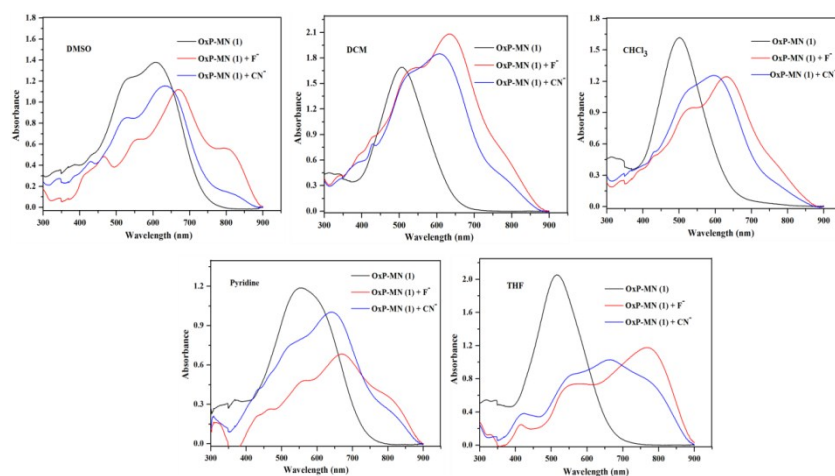

**Figure S10.** Absorption spectral changes upon addition of  $F^-$  and  $CN^-$  ions OxP-MN in different solvents.

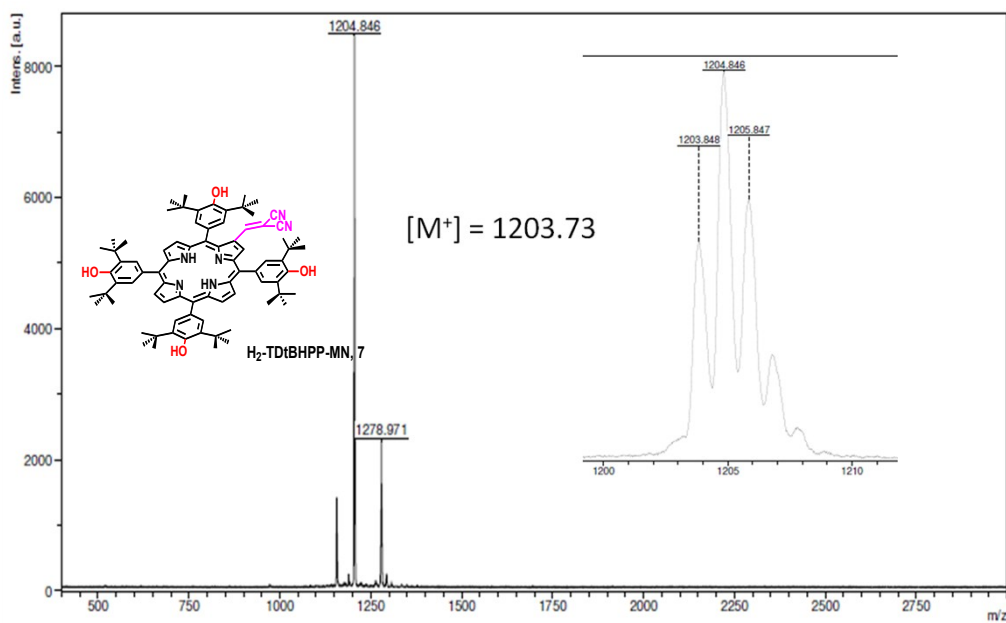

**Figure S11.** MALDI-TOF mass spectrum of reduced porphyrin ( $H_2$ -TDtBHPP-MN, **7**) in case of ( $OxP-MN \cdot 2F^-$ ) using ascorbic acid.



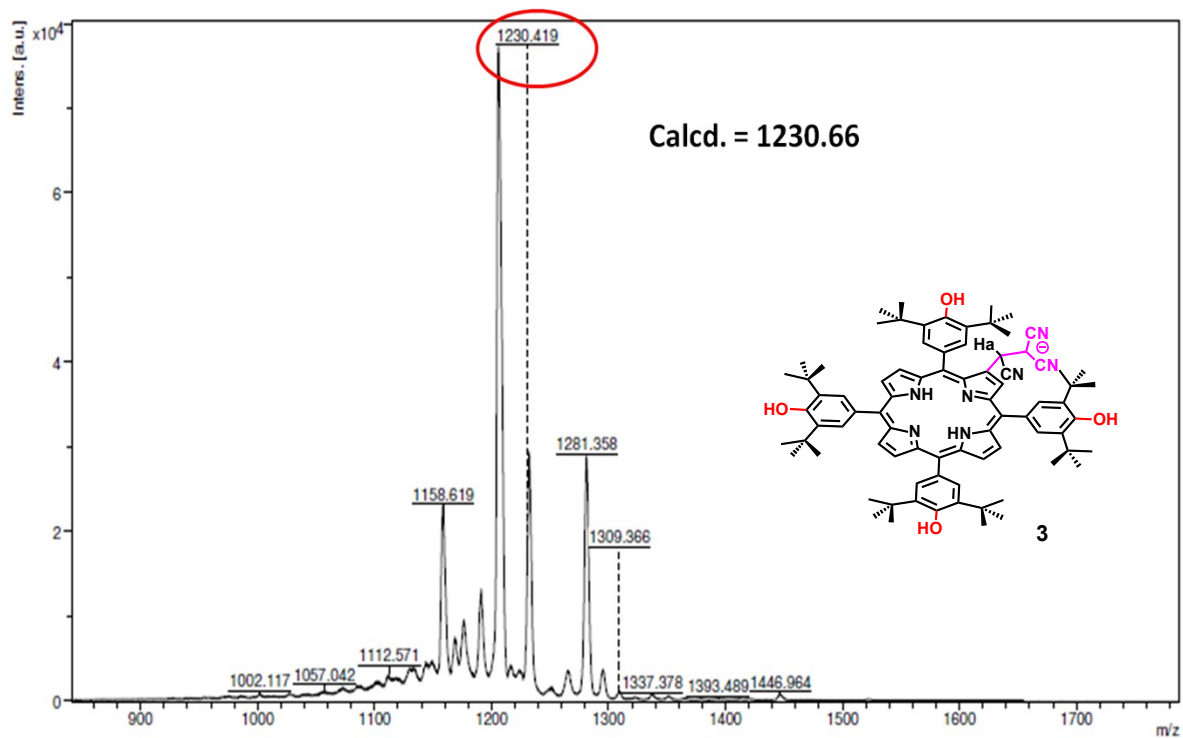

**Figure S12.** MALDI-TOF mass spectrum of reduced anionic porphyrin ( $H_2$ -TDtBHPP-TCE, **3**) derived from cyano adduct of oxoporphyrinogen (**2**) using ascorbic acid.

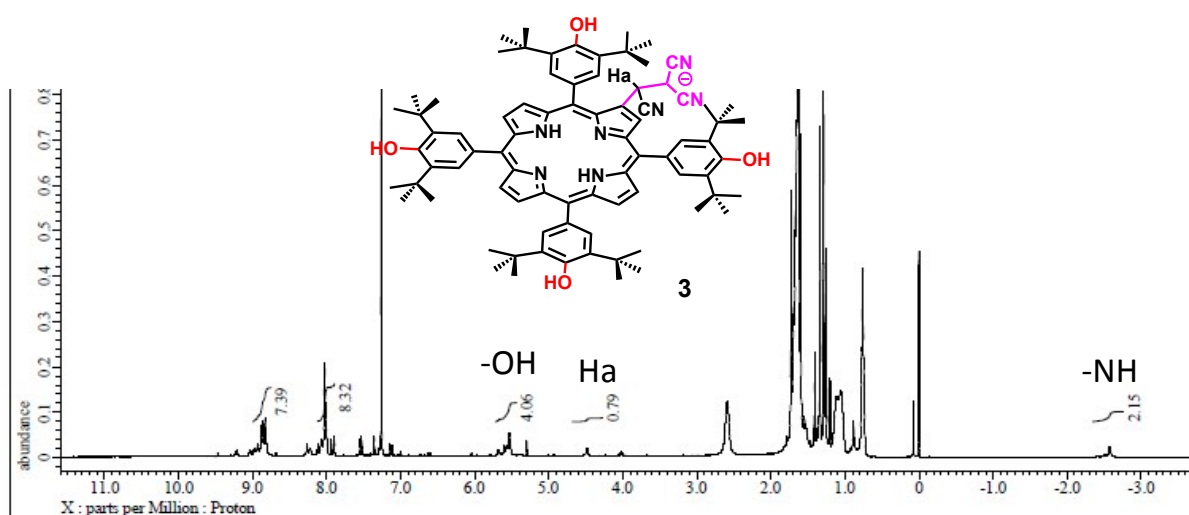

**Figure S13.**  $^1H$  NMR spectrum of reduced anionic porphyrin ( $H_2$ -TDtBHPP-TCE, **3**) derived from cyano adduct of oxoporphyrinogen (**2**) using ascorbic acid.

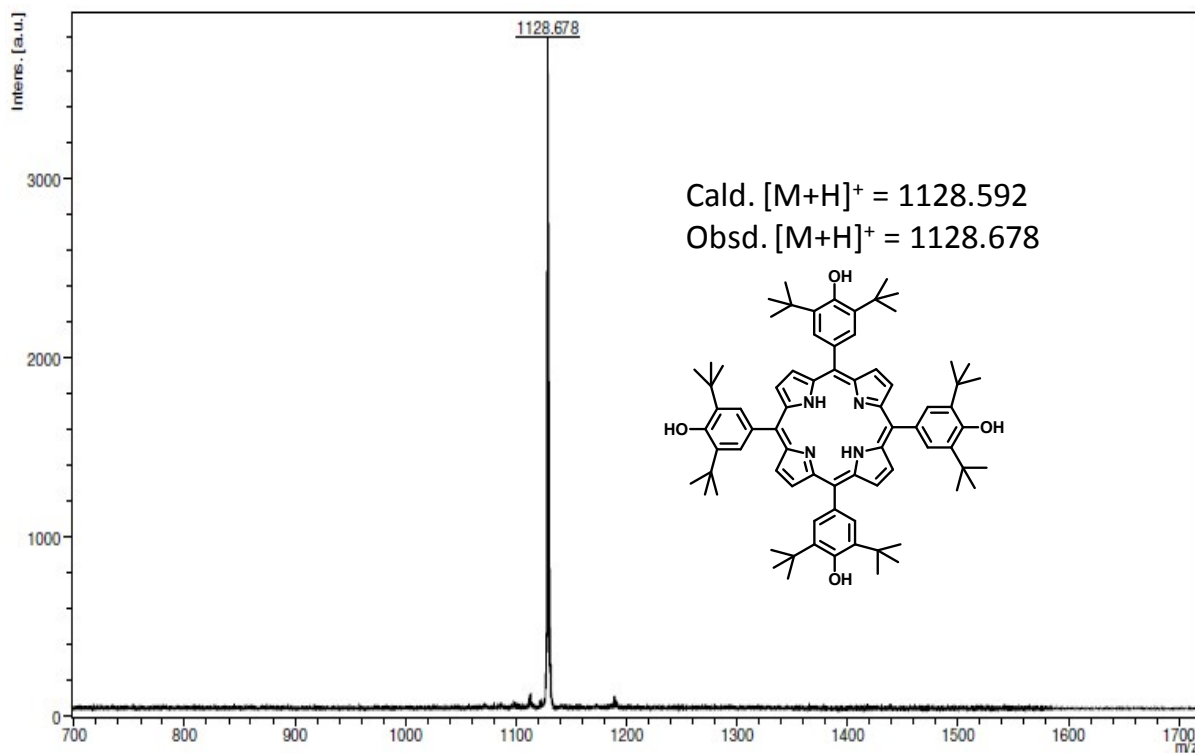

**Figure S14.** MALDI-TOF mass spectrum of reduced porphyrin ( $H_2$ -TDtBHPP) obtained from  $OxP\cdot 2F^-$  using ascorbic acid as reductant.

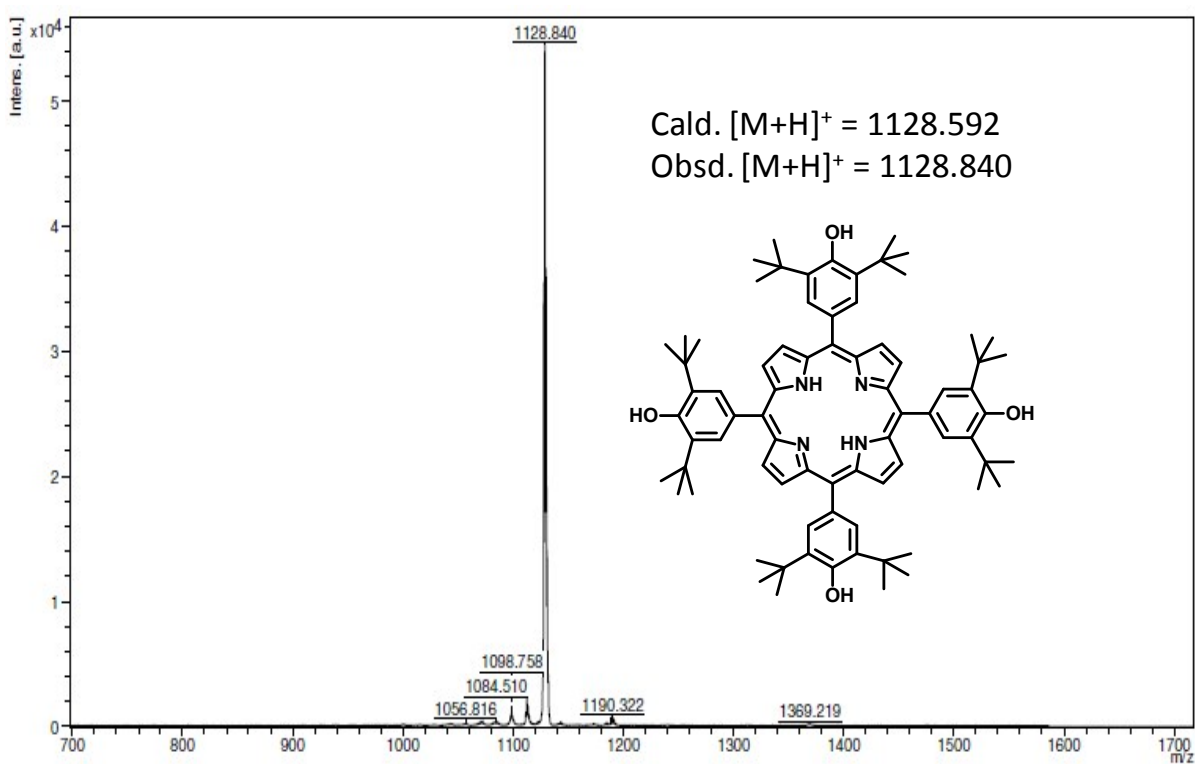

**Figure S15.** MALDI-TOF mass spectrum of reduced porphyrin ( $H_2$ -TDtBHPP) obtained from  $OxP\cdot 2CN^-$  using ascorbic acid as reductant.

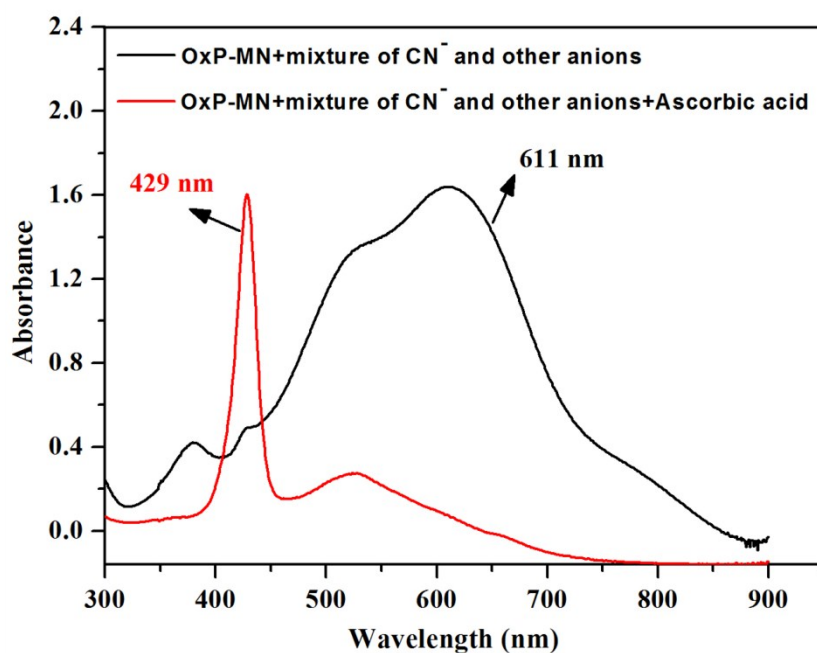

**Figure S16.** Spectral changes for the competitive recognition of  $\text{CN}^-$  using a mixture of  $\text{CN}^-$  and other anions using OxP-MN (**1**).

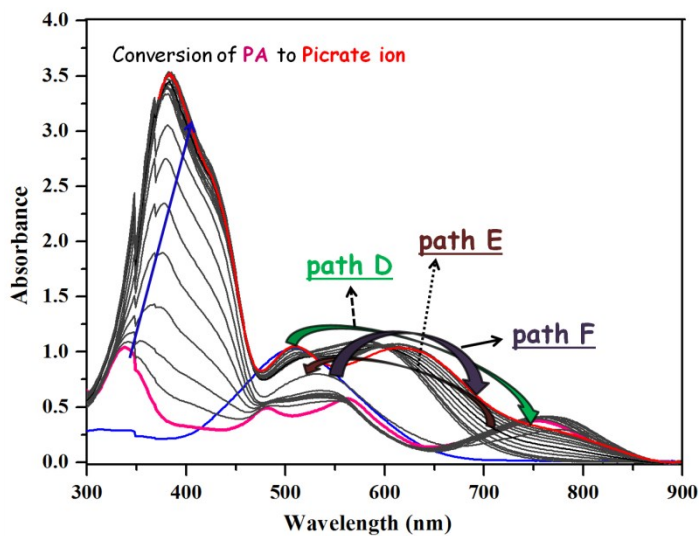

**Figure S17.** Absorption spectral features of OxP-MN (**1**) on sequential addition of PA and  $\text{CN}^-$  ions, respectively: path D (porphyrinogen to protonated porphodimethene), path E (protonated porphodimethene to OxP-MN), and path F (OxP-MN to OxP-MN+ $\text{CN}^- \cdot 2\text{CN}^-$ ).

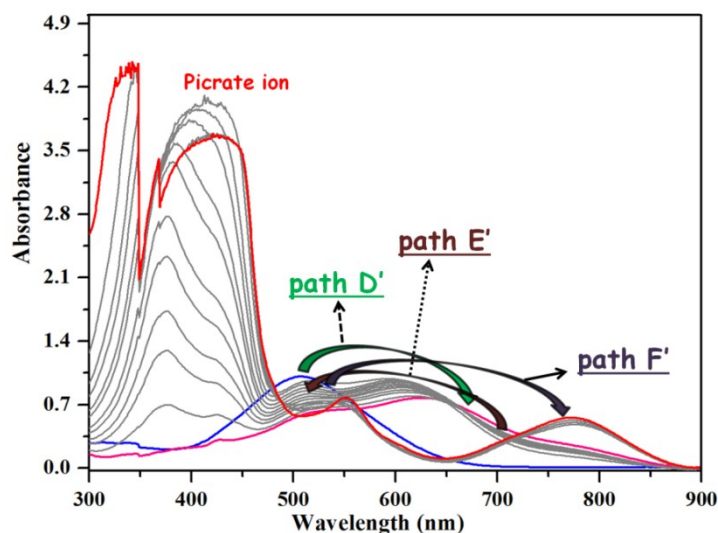

**Figure S18.** Absorption spectral features of OxP-MN (**1**) on sequential addition of  $\text{CN}^-$  and PA, respectively: path D' (porphyrinogen to OxP-MN+ $\text{CN}^- \cdot 2\text{CN}^-$ ), path E' (OxP-MN+ $\text{CN}^- \cdot 2\text{CN}^-$  to OxP-MN+ $\text{CN}^-$ ), path F' (OxP-MN+ $\text{CN}^-$  to anionic protonated porphodimethene).

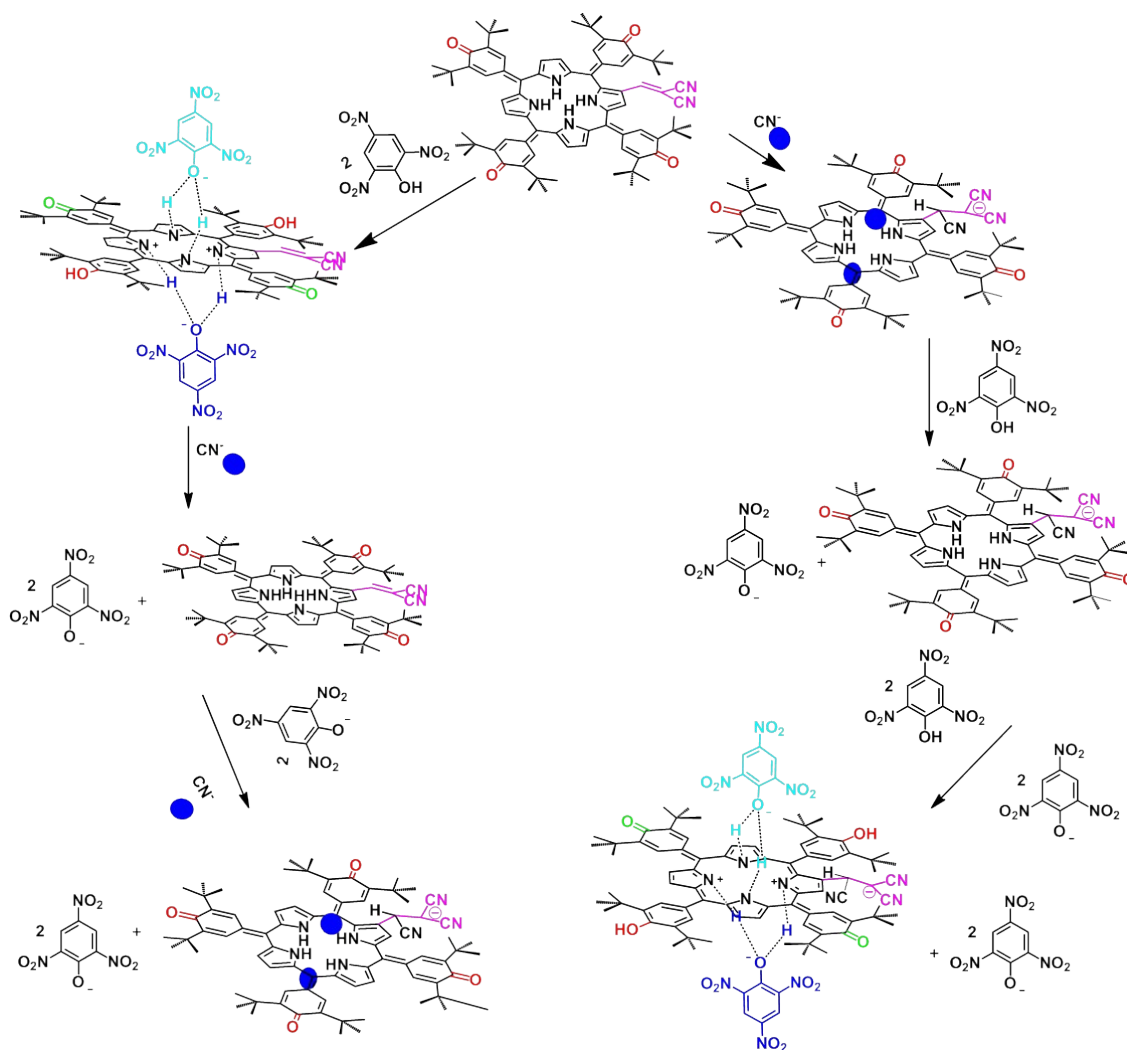

**Scheme S1.** Response of OxP-MN (**1**) towards  $\text{CN}^-$  and PA under indicator displacement assay (IDA) without restriction on queue.
